# Supplementary material for: Potentially highly potent drugs for 2019-nCoV
Source: bioRxiv or medRxiv preprint supplement (doi:10.1101/2020.02.05.936013), 2020-02-13
Supplement: Supplementary file [file media-1.pdf]

# Supplementary Materials

## Potentially highly potent drugs for 2019-nCoV

Duc Duy Nguyen<sup>1</sup>, Kaifu Gao<sup>1</sup>, Jiahui Chen<sup>1</sup>, Rui Wang<sup>1</sup>, and Guo-Wei Wei<sup>1,2,3 \*</sup>

<sup>1</sup> Department of Mathematics, Michigan State University, MI 48824, USA

<sup>2</sup> Department of Biochemistry and Molecular Biology  
Michigan State University, MI 48824, USA

<sup>3</sup> Department of Electrical and Computer Engineering  
Michigan State University, MI 48824, USA

### Contents

|                                    |          |
|------------------------------------|----------|
| <b>S1 Supplementary Figures</b>    | <b>1</b> |
| <b>S2 Supplementary Data Guide</b> | <b>5</b> |
| S2.0.0.1 TableS1.csv . . . . .     | 5        |
| S2.0.0.2 TableS2.csv . . . . .     | 5        |
| S2.0.0.3 TableS3.csv . . . . .     | 5        |
| S2.0.0.4 FileS1.zip . . . . .      | 5        |
| S2.0.0.5 FileS2.zip . . . . .      | 5        |
| S2.0.0.6 C . . . . .               | 5        |

---

\* Address correspondences to Guo-Wei Wei. E-mail:wei@math.msu.edu

## S1 Supplementary Figures

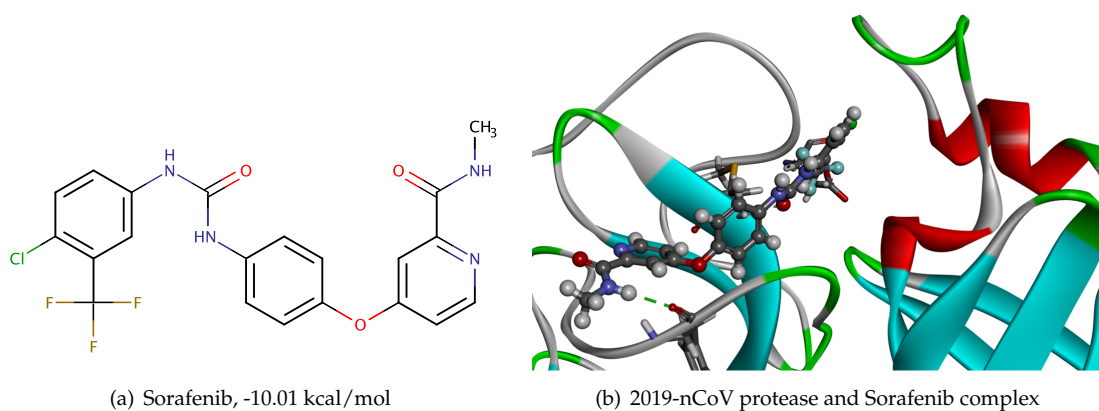

Figure 1: Sorafenib and its complex with 2019-nCoV protease.

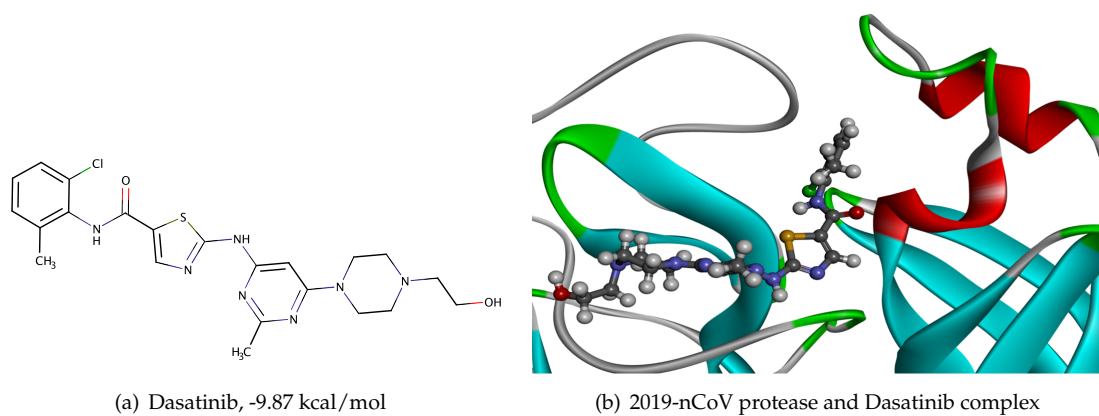

Figure 2: Dasatinib and its complex with 2019-nCoV protease.

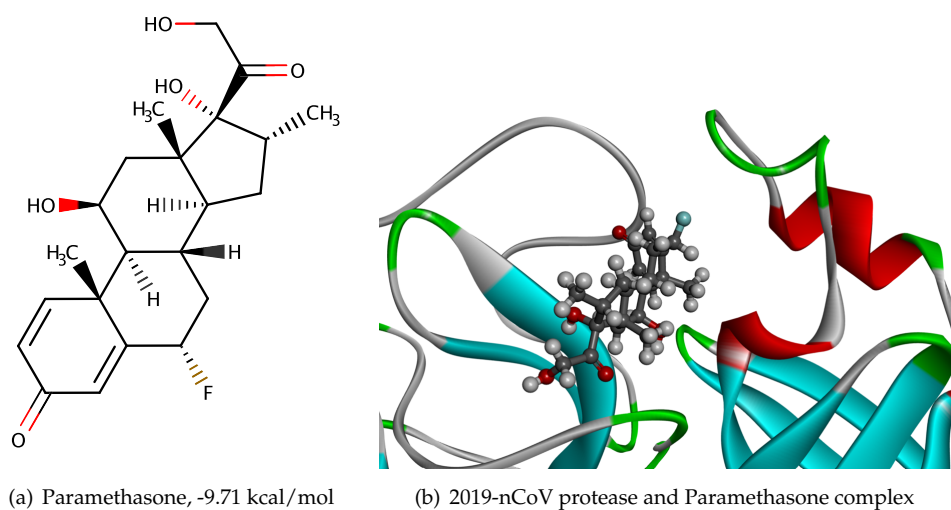

Figure 3: Paramethasone and its complex with 2019-nCoV protease.

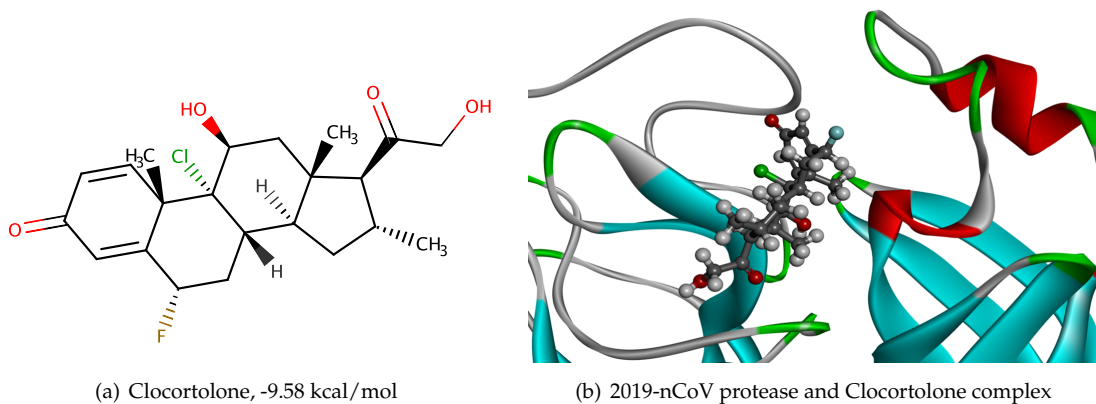

Figure 4: Clocortolone and its complex with 2019-nCoV protease.

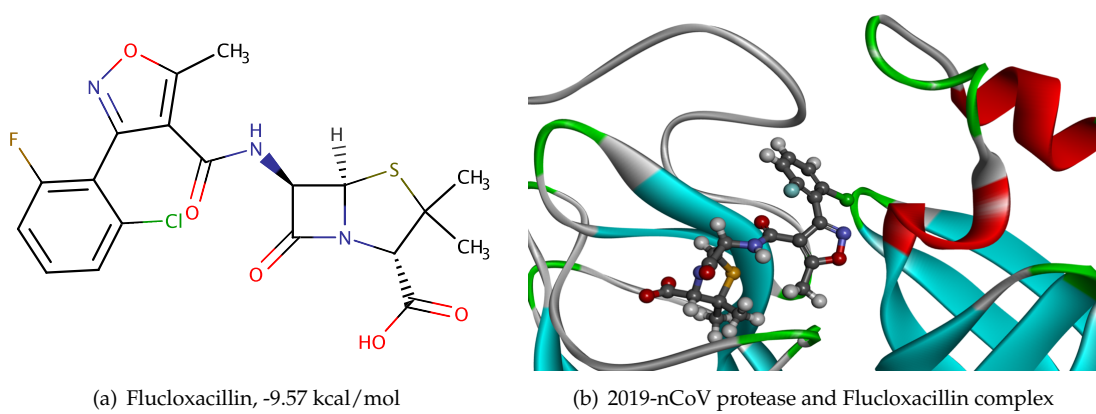

Figure 5: Flucloxacillin and its complex with 2019-nCoV protease.

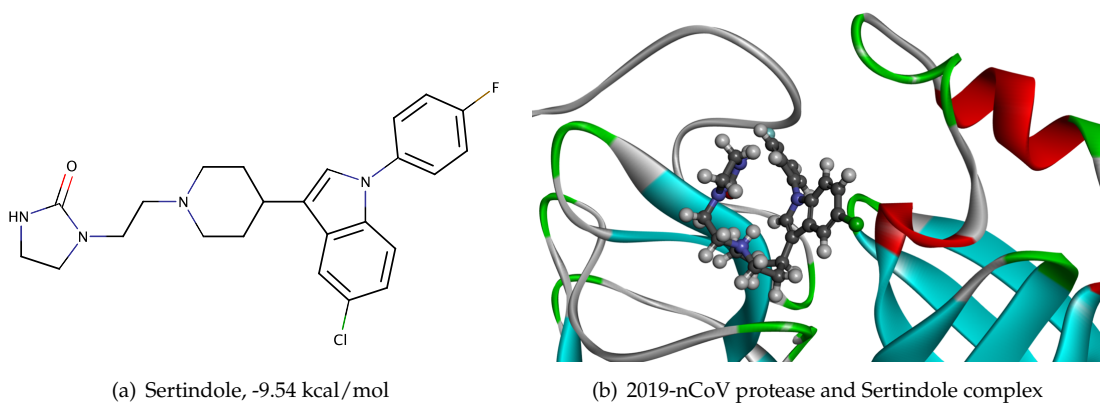

Figure 6: Sertindole and its complex with 2019-nCoV protease.

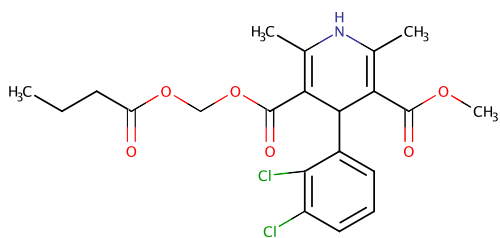

(a) Clevidipine, -9.52 kcal/mol

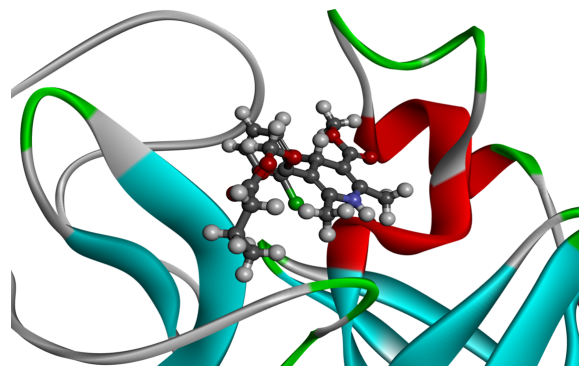

(b) 2019-nCoV protease and Clevidipine complex

Figure 7: Clevidipine and its complex with 2019-nCoV protease.

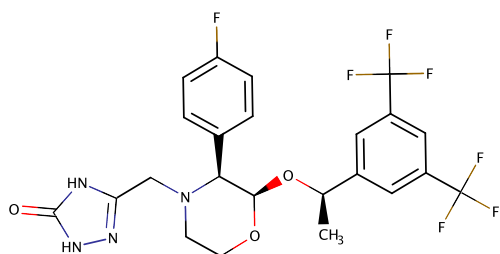

(a) Aprepitant, -9.49 kcal/mol

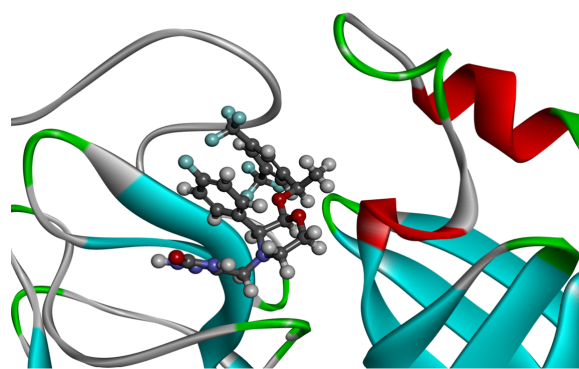

(b) 2019-nCoV protease and Aprepitant complex

Figure 8: Aprepitant and its complex with 2019-nCoV protease.

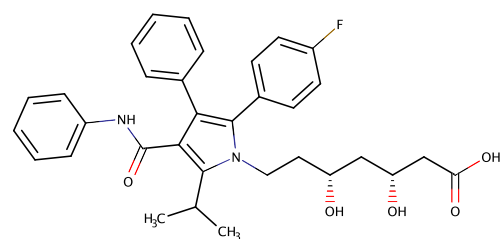

(a) Atorvastatin, -9.49 kcal/mol

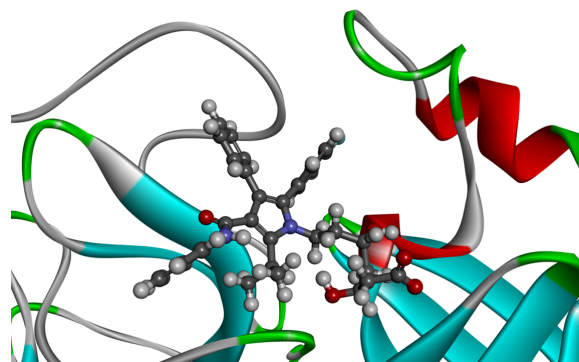

(b) 2019-nCoV protease and Atorvastatin complex

Figure 9: Atorvastatin and its complex with 2019-nCoV protease.

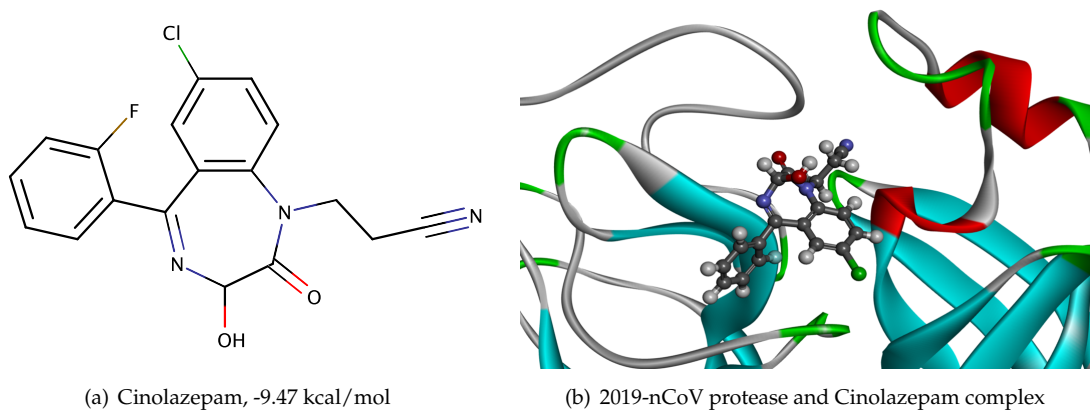

Figure 10: Cinolazepam and its complex with 2019-nCoV protease.

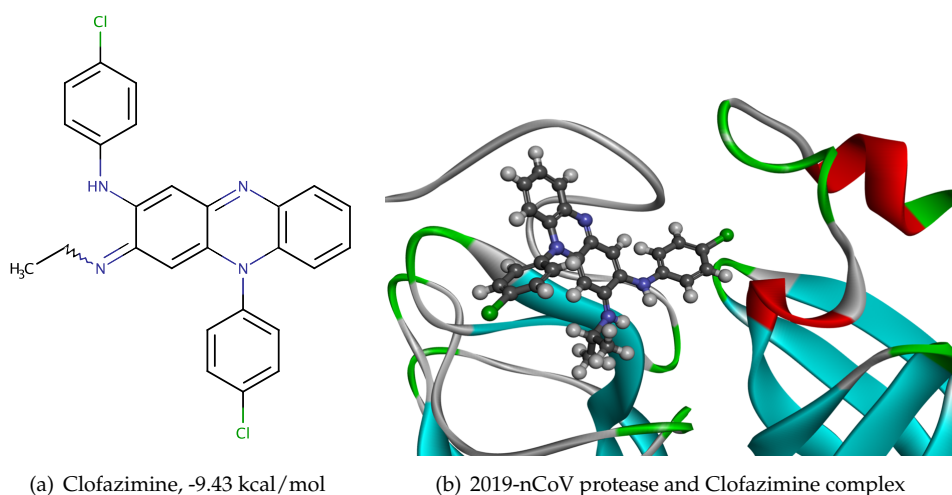

Figure 11: Clofazimine and its complex with 2019-nCoV protease.

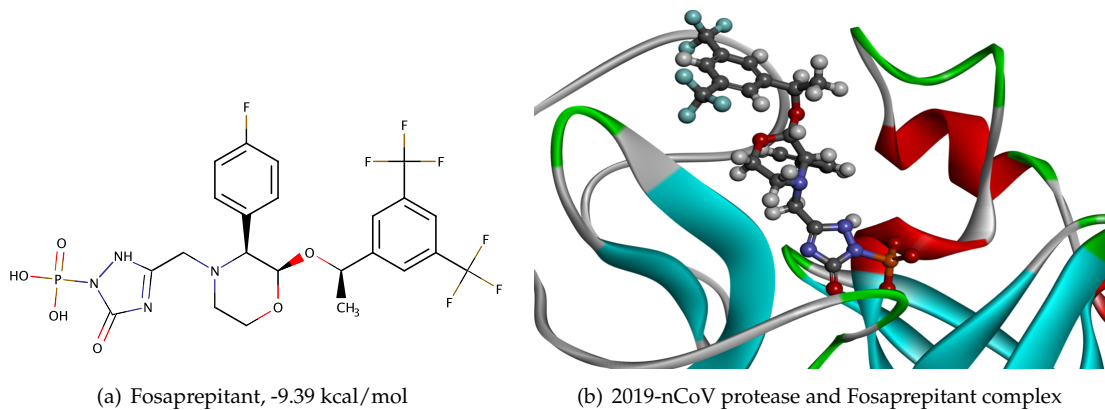

Figure 12: Fosaprepitant and its complex with 2019-nCoV protease.

Figures 2, 3, 4, 5, 6, 7, 8, 9, 10, 11, and 12 display top 4 to 15 molecules predicted by our 3D models. Their predicted binding affinities are given, together with their complexes with 2019-nCoV protease. These compounds are ranked according to their binding affinity values predicted by the consensus of 3DALL and 3DMT.

## S2 Supplementary Data Guide

Supplementary data are given in TableS1.csv, TableS2.csv, TableS3.csv, FileS2.zip, and FileS1.zip.

**S2.0.0.1 TableS1.csv** Table of the experimental IC50 of 84 SARS-CoV inhibitors.

**S2.0.0.2 TableS2.csv** Table of predicted binding affinities of 1445 FDA-approved drugs and 2019-nCoV protease.

**S2.0.0.3 TableS3.csv** Table of PDBID and experimental affinities of 15,843 complexes in PDBbind v2018 general set.

**S2.0.0.4 FileS1.zip** 3D structures of 84 complexes of SARS-CoV protease inhibitors and 2019-nCoV protease.

**S2.0.0.5 FileS2.zip** 3D structures of 1445 complexes of FDA-approved drugs and 2019-nCoV protease.

**S2.0.0.6 Software** Codes for our deep learning models will be made available to ensure the full reproducibility of the present results.
